# Supplementary material
Source: publisher figshare collection journal article supplement (https://frontiersin.figshare.com/ndownloader/files/28911573)
Supplement: Supplementary file [file 28911573]

**Table S1 Laboratory data on ICU admission of the 391 patients**

| <b>Parameters</b>                 | <b>Total, median<br/>(IQR) (n=391)</b> | <b>Derivation<br/>median (IQR)<br/>(n=293)</b> | <b>Validation<br/>median (IQR)<br/>(n=98)</b> | <b><i>p</i> values</b> |
|-----------------------------------|----------------------------------------|------------------------------------------------|-----------------------------------------------|------------------------|
| WBC (3.5-9.5×10 <sup>9</sup> /L)  | 7.1 (4.1, 0.9)                         | 7.2 (4, 10.5)                                  | 7 (4.2, 12.4)                                 | 0.2505                 |
| RBC (3.8-5.1×10 <sup>12</sup> /L) | 3.3 (2.6, 3.9)                         | 3.2 (2.6, 3.9)                                 | 3.3 (2.7, 4.1)                                | 0.2347                 |
| Hb (115-150 g/L)                  | 93 (77, 116)                           | 92 (76, 114)                                   | 94 (80, 118)                                  | 0.5090                 |
| Plt (125-350×10 <sup>12</sup> /L) | 113 (61, 184)                          | 102 (54, 173)                                  | 143.5 (81, 201)                               | 0.0021                 |
| NE% (40-75%)                      | 83.1 (73.2, 89.9)                      | 82.3 (72.3, 89.7)                              | 84.5 (77.3, 90.5)                             | 0.1028                 |
| Lyn% (20-50%)                     | 10.6 (6.2, 17.4)                       | 10.9 (6.2, 18)                                 | 9.8 (6.6, 15.2)                               | 0.3138                 |
| Alb (35-55 g/L)                   | 27.5 (22.8, 32.5)                      | 27.3 (22.1, 32.5)                              | 27.7 (24.2, 32.5)                             | 0.3013                 |
| Glb (20-35 g/L)                   | 28.7 (24, 35.1)                        | 28 (23, 34.6)                                  | 31.6 (27.4, 36.7)                             | 0.0010                 |
| ALT (0-40 U/L)                    | 28 (15, 65)                            | 28 (16.9, 68)                                  | 26.5 (15, 45)                                 | 0.2566                 |
| AST (0-40 U/L)                    | 34 (21, 77)                            | 35 (22, 79)                                    | 33.5 (20, 63)                                 | 0.4475                 |
| GGT (0-58 U/L)                    | 44 (23, 120)                           | 45 (22.7, 121.4)                               | 43.2 (24, 108.8)                              | 0.9695                 |
| ALP (35-105 U/L)                  | 72 (52, 108)                           | 70 (52, 107)                                   | 75 (52.9, 109.5)                              | 0.4132                 |
| TBil (0-25 mmol/L)                | 7.9 (5, 17.5)                          | 7.9 (4.9, 17.5)                                | 7.8 (5.1, 17)                                 | 0.6698                 |
| DBil (0-10 mmol/L)                | 3.8 (2.4, 8.4)                         | 3.7 (2.3, 8.2)                                 | 4.1 (2.6, 8.4)                                | 0.4698                 |
| IBil (0-14 mmol/L)                | 3.8 (2.2, 6.9)                         | 3.8 (2.3, 6.5)                                 | 3.5 (2.1, 7.3)                                | 0.9333                 |
| PTa (70-150 s)                    | 110 (87, 132)                          | 110 (88.1, 131.4)                              | 109.5 (75.1, 132.8)                           | 0.4485                 |
| Urea (2.2-8.2 mmol/L)             | 8.5 (5.4, 16.4)                        | 8.5 (5.6, 16.7)                                | 8.6 (5, 14.7)                                 | 0.4874                 |
| Cr (20-115 µmol/L)                | 75.8 (49, 158)                         | 77 (50, 169)                                   | 70 (48, 140)                                  | 0.4399                 |
| UA (140-360 mmol/L)               | 330 (220, 479)                         | 340 (225, 480)                                 | 296 (206, 466)                                | 0.3001                 |
| CRP (0-10 g/L)                    | 29.4 (7.3, 79.8)                       | 27.3 (6.5, 75.2)                               | 45.1 (11, 84.1)                               | 0.0556                 |
| ESR (0-15 mm/h)                   | 37 (19, 79)                            | 36 (19, 69.25)                                 | 45 (19.5, 101)                                | 0.1916                 |
| PH (7.35-7.45)                    | 7.4 (7.4, 7.5)                         | 7.4 (7.4, 7.5)                                 | 7.4 (7.4, 7.5)                                | 0.9893                 |
| LA (0.5-1.7 mmol/L)               | 1.6 (1.0, 2.8)                         | 1.6 (0.9, 2.9)                                 | 1.6 (1.025, 2.675)                            | 0.8146                 |
| C3 (0.9-1.8 g/L)                  | 0.64 (0.41, 0.88)                      | 0.61 (0.38, 0.85)                              | 0.75 (0.43, 0.99)                             | 0.0740                 |
| C4 (0.1-0.4 g/L)                  | 0.15 (0.09, 0.22)                      | 0.14 (0.09, 0.21)                              | 0.18 (0.10, 0.25)                             | 0.0347                 |
| Anti-dsDNA (0-100 U/L)            | 123 (56, 450)                          | 123.5 (60, 432.8)                              | 99 (56, 456)                                  | 0.8160                 |

ICU, intensive care unit; IQR, interquartile range; WBC, white blood cell count; RBC, red blood cell count; Hb, hemoglobin; Plt, platelet count; NE%, neutrophil percentage; Lyn%, lymphocyte percentage; Alb, albumin; Glb, globulin; ALT, alanine transaminase; AST, aspartate aminotransferase; GGT, gamma-glutamyl transpeptidase; ALP, alkaline phosphatase; TBil, total bilirubin; DBil, direct bilirubin; IBil, indirect bilirubin; PTa, prothrombin activity; Urea, blood urea nitrogen; Cr, creatinine; UA, uric acid; CRP, C-reactive protein; ESR, erythrocyte sedimentation rate; PH, potential of hydrogen; LA, lactic acid; C3, complement C3; C4, complement C4.
